# Supplementary material for: Carbon nanofiber-based catalysts derived from polyacrylonitrile for efficient oxygen reduction in alkaline and neutral Zn–air batteries
Source: Royal Society of Chemistry journal article supplement (doi:10.1039/d1qm01560e), 2022-01-01
Supplement: d1qm01560e1.pdf [file d1qm01560e1.pdf]

### **Electronic Supplementary Information**

Carbon nanofiber-based catalysts derived from polyacrylonitrile for efficient oxygen reduction in alkaline and neutral Zn-air batteries

Min Lu, Xiumei Chen, Yu Xu, Ruigang Liu, Xiaoji Xie\*

Key Laboratory of Flexible Electronics (KLOFE) & Institute of Advanced Materials (IAM)

Nanjing Tech University, Nanjing 211816, China

Email: iamxjie@njtech.edu.cn

## Experimental details

### a. General characterization

Thermogravimetric analysis was carried out on a thermogravimetric analyzer (TGA2, Mettler Toledo) in the O<sub>2</sub> environment. Morphology was observed by a scanning electron microscope (JSM-7800F, JEOL), a transmission electron microscope (JEM-1400 plus, JEOL) and a high-resolution transmission electron microscope (JEM-2100F, JEOL). Fourier transform infrared (FTIR) spectra were recorded on a Bruker (Alpha) FTIR spectrometer. X-ray diffraction (XRD) analysis was carried out on an X-ray diffractometer (Smart Lab 9 kW, Rigaku). X-ray photoelectron spectroscopy (XPS) was performed on an ESCALAB 250Xi spectrometer (Thermo Scientific). The N<sub>2</sub>-sorption isotherm, Brunauer-Emmett-Teller (BET) surface area, and pore volume of the materials were analyzed using a surface area and porosity analyzer (ASAP 2460, Micromeritics) at 77 K. Raman spectra were collected on a Raman spectrometer (iHR 550, Horiba). Electrochemical tests were carried out on an electrochemical workstation (Zennium, Zahner) equipped with a rotating ring-disk electrode (RRDE, E7R9 (Tip), Shaft (MSR), Pine Research Instrumentation).

### b. Electrochemical measurements

To test the catalytic performance, the obtained catalysts were drop-casted onto the polished glassy carbon disk (diameter: 5.5 mm) of the RRDE to form a thin layer under steady rotation (700 rpm), reaching a certain loading amount (0.2 or 1.0 mg cm<sup>-2</sup>).<sup>S1</sup> Meanwhile, the 20% Pt/C catalyst (Johnson Matthey) was used as the benchmark catalyst, and drop-casted by the same method for comparison. The catalyst-coated electrode was used as the working electrode for electrochemical characterizations in different electrolytes. Specifically, a KOH solution (0.1 M) was used as the alkaline electrolyte, and a phosphate

buffer (PB, 50 mM, a solution of 31.3 mM Na<sub>2</sub>HPO<sub>4</sub> and 18.7 mM NaH<sub>2</sub>PO<sub>4</sub>, pH = 7) was used as the neutral electrolyte. Notably, a Pt mesh was used as the counter electrode and the Ag/AgCl/KCl (3 M) electrode was used as the reference electrode. Unless otherwise noted, the potential presented was converted into the reversible hydrogen electrode (RHE) scale using Equation S1.

$$E_{RHE} = E_{Ag/AgCl} + 0.21 + 0.059 \times \text{pH} \quad (\text{S1})$$

Before electrochemical tests, the electrolyte was purged with O<sub>2</sub> for 30 min to create an O<sub>2</sub>-saturated environment. Linear sweep voltammetry (LSV) was carried out at a scan rate of 5 mV s<sup>-1</sup> with rotating rates from 625 to 2500 rpm. On the basis of LSV result, 1/*j* was plotted against ω<sup>-1/2</sup> according to Koutecky-Levich equation (Equation S2).

$$\frac{1}{j} = \frac{1}{j_L} + \frac{1}{j_K} = \frac{1}{B\omega^{1/2}} + \frac{1}{j_K} \quad (\text{S2})$$

where *j* is the current density of the glassy carbon disk (mA cm<sup>-2</sup>), *j<sub>L</sub>* and *j<sub>K</sub>* are the limiting and kinetic current densities (mA cm<sup>-2</sup>) respectively, ω is the rotation rate (rpm) of the disk, and *B* is defined by Equation S3.

$$B = 0.2nFC_0(D_0)^{2/3}\nu^{-1/6} \quad (\text{S3})$$

where *n* is the electron transfer number, *F* is the Faraday constant, *C<sub>o</sub>* is the bulk concentration of O<sub>2</sub>, *D<sub>o</sub>* is the diffusion coefficient of O<sub>2</sub>, and *ν* is the kinematic viscosity of the electrolyte.

For the RRDE test, the disk current density (*j<sub>d</sub>*) and ring current density (*j<sub>r</sub>*) were recorded simultaneously. The scan rate was 5 mV s<sup>-1</sup>, the rotating rate was 1600 rpm, and the ring potential was set as 1.50 V vs. RHE. On the basis of RRDE results, the H<sub>2</sub>O<sub>2</sub>

selectivity and electron transfer number ( $n$ ) can be derived using the following equations (Equation S4 and S5).

$$\text{H}_2\text{O}_2 \text{ selectivity} = 2 \times \frac{j_r/N}{j_d + j_r/N} \quad (\text{S4})$$

$$n = 4 \times \frac{j_d}{j_r/N + j_d} \quad (\text{S5})$$

where  $j_d$  is the disk current density,  $j_r$  is the ring current density, and  $N$  is current collection efficiency of the Pt ring (38% as the measured value).

The stability of the catalysts was evaluated by accelerated durability test (ADT). Briefly, LSV was at first measured in O<sub>2</sub>-saturated electrolytes, and measured again after 5000 cyclic scans (scan rate: 100 mV s<sup>-1</sup>) for comparison. In the alkaline electrolyte (0.1 M KOH solution), the potential range for cyclic scan was set as 0.1 to -0.3 V (vs. Ag/AgCl/KCl (3 M)). In the neutral electrolyte (50 mM phosphate buffer), the potential range for cyclic scan was set as 0.2 to -0.2 V (vs. Ag/AgCl/KCl (3 M)). The methanol tolerance of the catalyst was evaluated by chronoamperometry during which methanol was added into the 0.1 M KOH electrolyte to reach the concentration of 1 M.

Electrochemical active surface area (ECSA) of the catalyst was measured on the catalyst-coated glassy carbon disk (0.2 mg cm<sup>-2</sup>) by cyclic voltammetry (CV) in the non-Faradaic region based on the double-layer capacitance. Particularly, 0.1 M KOH was used as the electrolyte, the potential range was set as a 0.1 V window centered at the open circuit potential (e.g., -0.167 to -0.067 V vs. Ag/AgCl/KCl (3 M) for CNF-230), and the scan rates were set as 10, 15, 20, 25, 30 and 35 mV s<sup>-1</sup>. The ECSA of the catalysts can be calculated from the electrochemical double-layer capacitance ( $C_{dl}$ ) according to the Equation S6.<sup>S2, S3</sup>

$$\text{ECSA} = \frac{C_{dl}}{C_s} \quad (\text{S6})$$

where  $C_{dl}$  is the slope of current density against scan rate, and  $C_s$  is the specific capacitance associated with smooth carbon catalysts ( $40 \mu\text{F cm}^{-2}$ ).<sup>S3</sup>

c. Practical application in Zn-air batteries

The practical applications were carried out in both the alkaline and neutral Zn-air batteries.<sup>S4</sup> The Zn-air battery was assembled in a cubic configuration with the Zn plate anode ( $4.5 \text{ cm}^2$ , thickness: 0.2 mm), and the carbon cloth cathode ( $1 \text{ cm}^2$ ) which was coated with polytetrafluoroethylene ( $13.5 \text{ mg cm}^{-2}$ ) on the air-facing side and catalyst (CNF-based catalysts:  $1.0 \text{ mg cm}^{-2}$  or Pt/C:  $0.2 \text{ mg cm}^{-2}$ ) on the electrolyte-facing side. Between the anode and cathode, the distance was 1.4 cm, and the total volume of electrolyte was 4 mL. For the alkaline Zn-air battery, a solution containing KOH (6 M) and  $\text{Zn}(\text{CH}_3\text{COO})_2$  (0.2 M) was used as the electrolyte. For the neutral Zn-air battery, a solution containing  $\text{NH}_4\text{Cl}$  (4.0 M) and KCl (2.0 M) was used as the electrolyte, and the pH of the electrolyte was adjusted to 7 by  $\text{NH}_3 \cdot \text{H}_2\text{O}$ . The polarization curve was measured by LSV, and the scan rate was  $5 \text{ mV s}^{-1}$ .

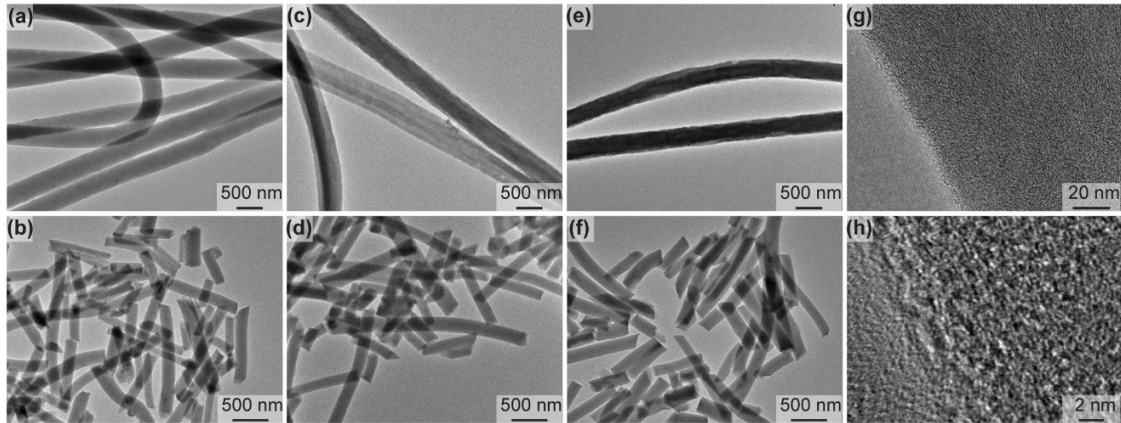

Figure S1. (a-f) TEM images of PAN-based materials and CNF-based catalysts. (a) PAN-230, (b) CNF-230, (c) PAN-230-H<sub>2</sub>O, (d) CNF-230-H<sub>2</sub>O, (e) PAN-230-H<sub>2</sub>O<sub>2</sub>, (f) CNF-230-H<sub>2</sub>O<sub>2</sub>. (g, h) High-resolution TEM images of CNF-230-H<sub>2</sub>O<sub>2</sub>.

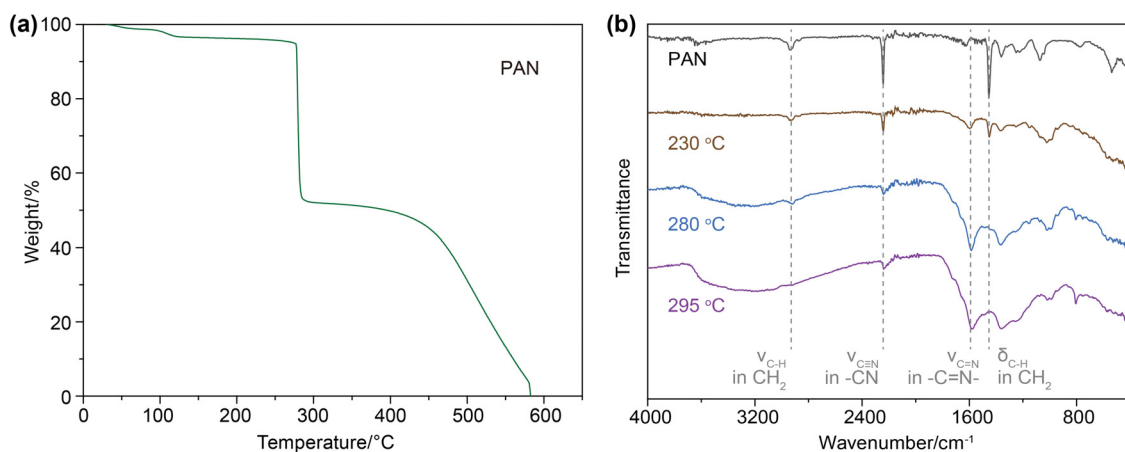

Figure S2. (a) TG curve of PAN mat in O<sub>2</sub> environment. (b) Fourier transform infrared spectra of PAN and PAN preoxidized at 230, 280, and 295 °C in air.

The PAN was preoxidized at different temperatures in air for 1 h to study the structure evolution, and the resulting materials were characterized by infrared spectroscopy. As shown in Figure S2b, three characteristic peaks, attributed to the C-H stretch in CH<sub>2</sub> (~2931 cm<sup>-1</sup>), C≡N stretch in CN (~2241 cm<sup>-1</sup>) and C-H bending in CH<sub>2</sub> (~1452 cm<sup>-1</sup>), decrease after proxidization.<sup>S5,S6</sup> Meanwhile, another peak appears at ~1579 cm<sup>-1</sup>, which can be attributed to the C=N stretch in the -C=N- structure.<sup>S6</sup> The infrared spectra reveal the cyclization of the PAN structure to a six-membered ring-containing structure to different extents after the preoxidation at varied temperatures. To keep the cyclization at a relatively low level and to introduce more oxygen-containing groups in the next oxidation step, we chose 230 °C as the preoxidation temperature.

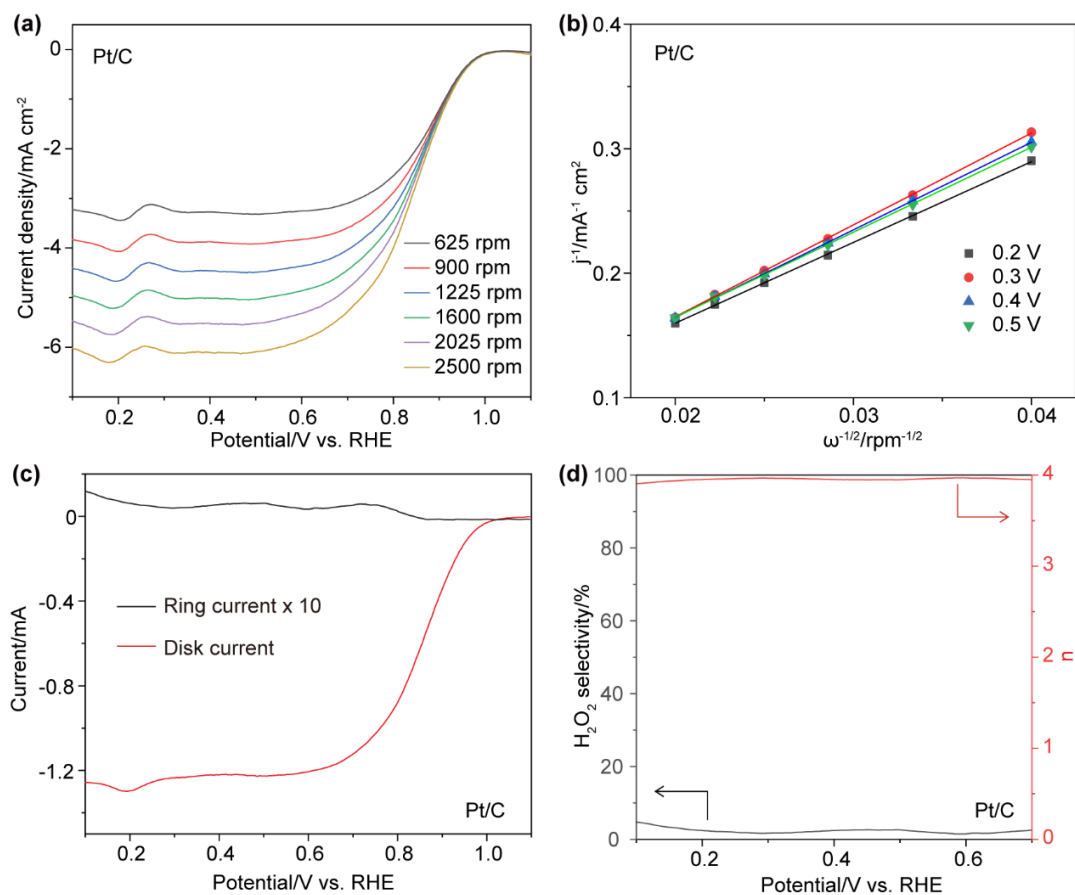

Figure S3. (a) Linear sweep voltammograms of the Pt/C catalyst at rotating rates of 625 to 2500 rpm in the O<sub>2</sub>-saturated 0.1 M KOH. (b) The K-L plots corresponding to the linear sweep voltammograms in (a). (c) Ring and disk currents on a rotating ring-disk electrode using the Pt/C catalyst in the O<sub>2</sub>-saturated 0.1 M KOH at a rotating rate of 1600 rpm. (d) H<sub>2</sub>O<sub>2</sub> selectivity and electron transfer number based on ring and disk currents using the Pt/C catalyst.



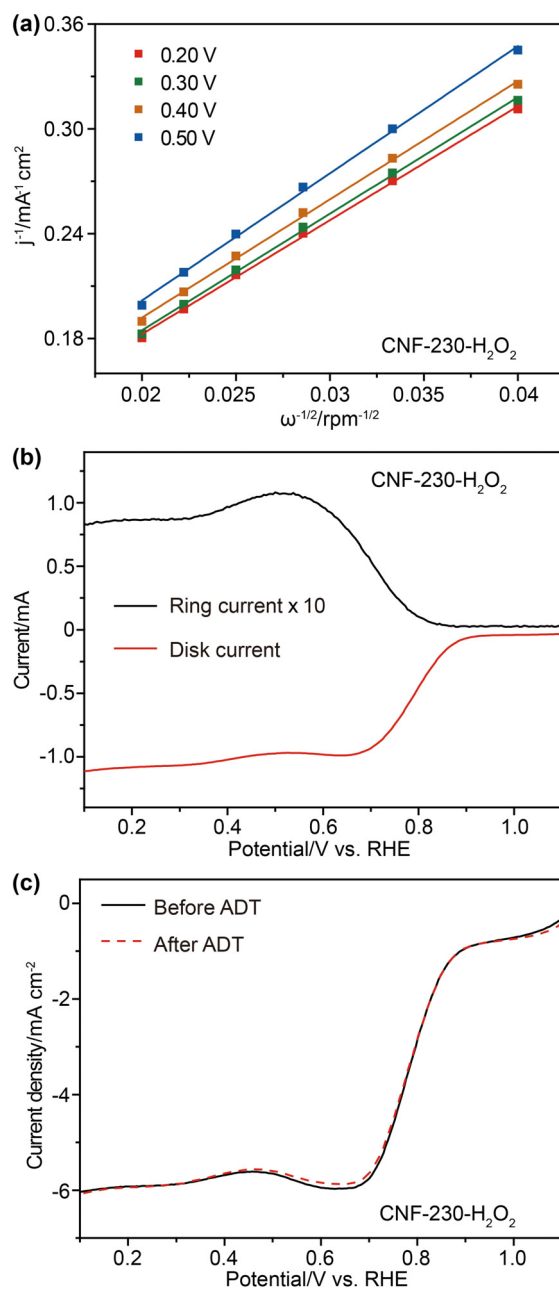

Figure S4. (a) The K-L plots corresponding to the linear sweep voltammograms in Figure 2b. (b) Ring and disk currents on a rotating ring-disk electrode using the CNF-230-H<sub>2</sub>O<sub>2</sub> catalyst in the O<sub>2</sub>-saturated 0.1 M KOH at a rotating rate of 1600 rpm. (c) Linear sweep voltammograms of the CNF-230- H<sub>2</sub>O<sub>2</sub> catalyst before and after 5000 cyclic scans of the accelerated durability test (ADT) at a rotating rate of 1600 rpm.

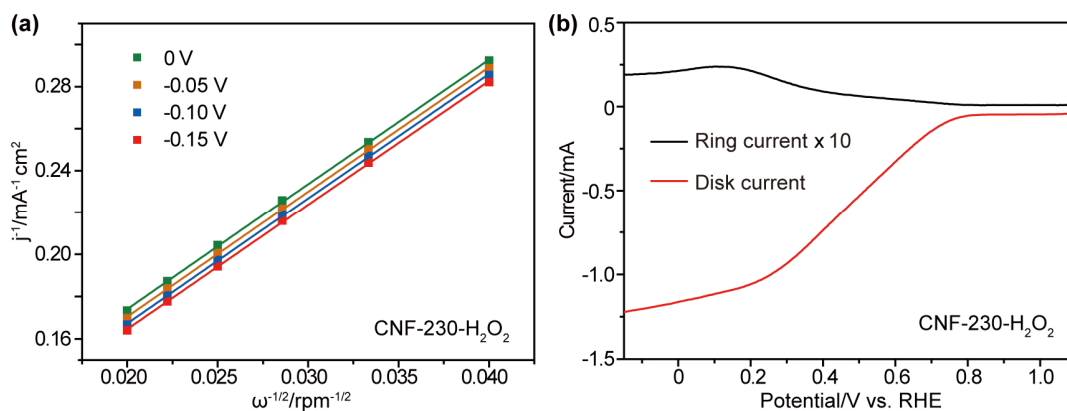

Figure S5. (a) The K-L plots corresponding to the linear sweep voltammograms in Figure 3c. (b) Ring and disk currents on a rotating ring-disk electrode using the CNF-230-H<sub>2</sub>O<sub>2</sub> catalyst in the O<sub>2</sub>-saturated 50 mM PB at a rotating rate of 1600 rpm.

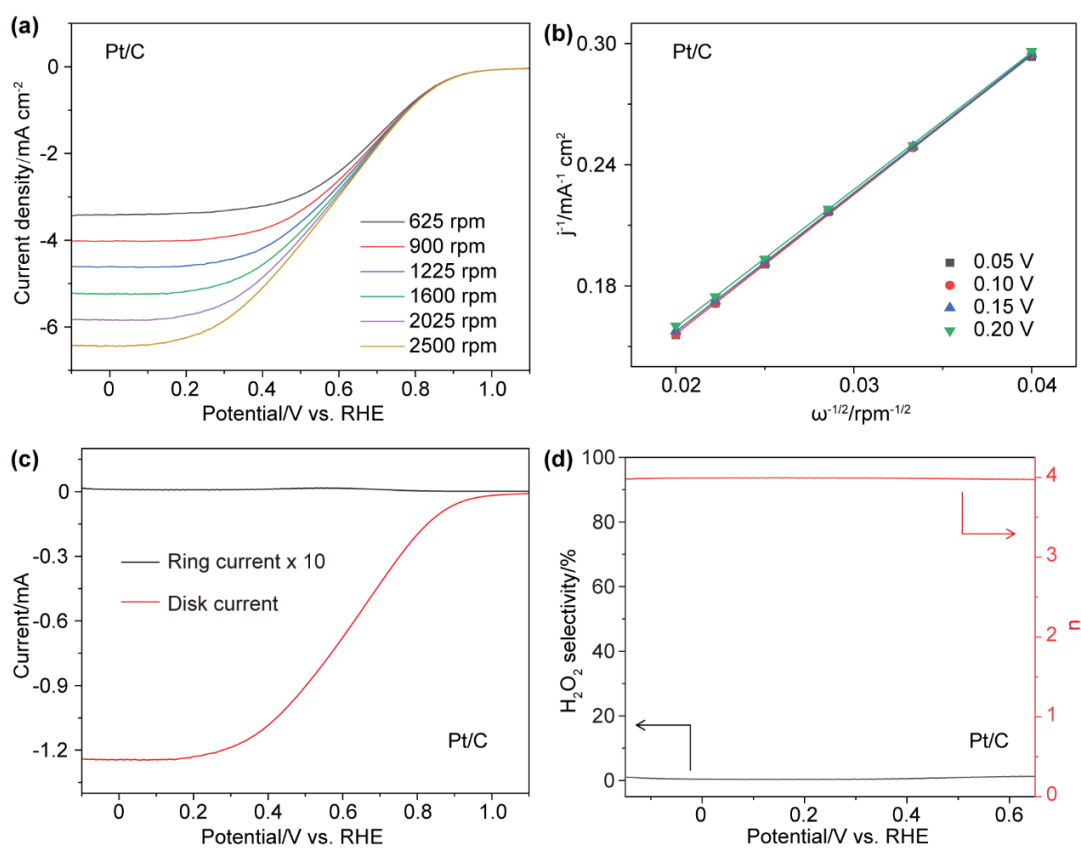

Figure S6. (a) Linear sweep voltammograms of the Pt/C catalyst at rotating rates of 625 to 2500 rpm in the O<sub>2</sub>-saturated 50 mM PB. (b) The K-L plots corresponding to the linear sweep voltammograms in (a). (c) Ring and disk currents on a rotating ring-disk electrode using the Pt/C catalyst in the O<sub>2</sub>-saturated 50 mM PB at a rotating rate of 1600 rpm. (d) H<sub>2</sub>O<sub>2</sub> selectivity and electron transfer number based on ring and disk currents using the Pt/C catalyst.

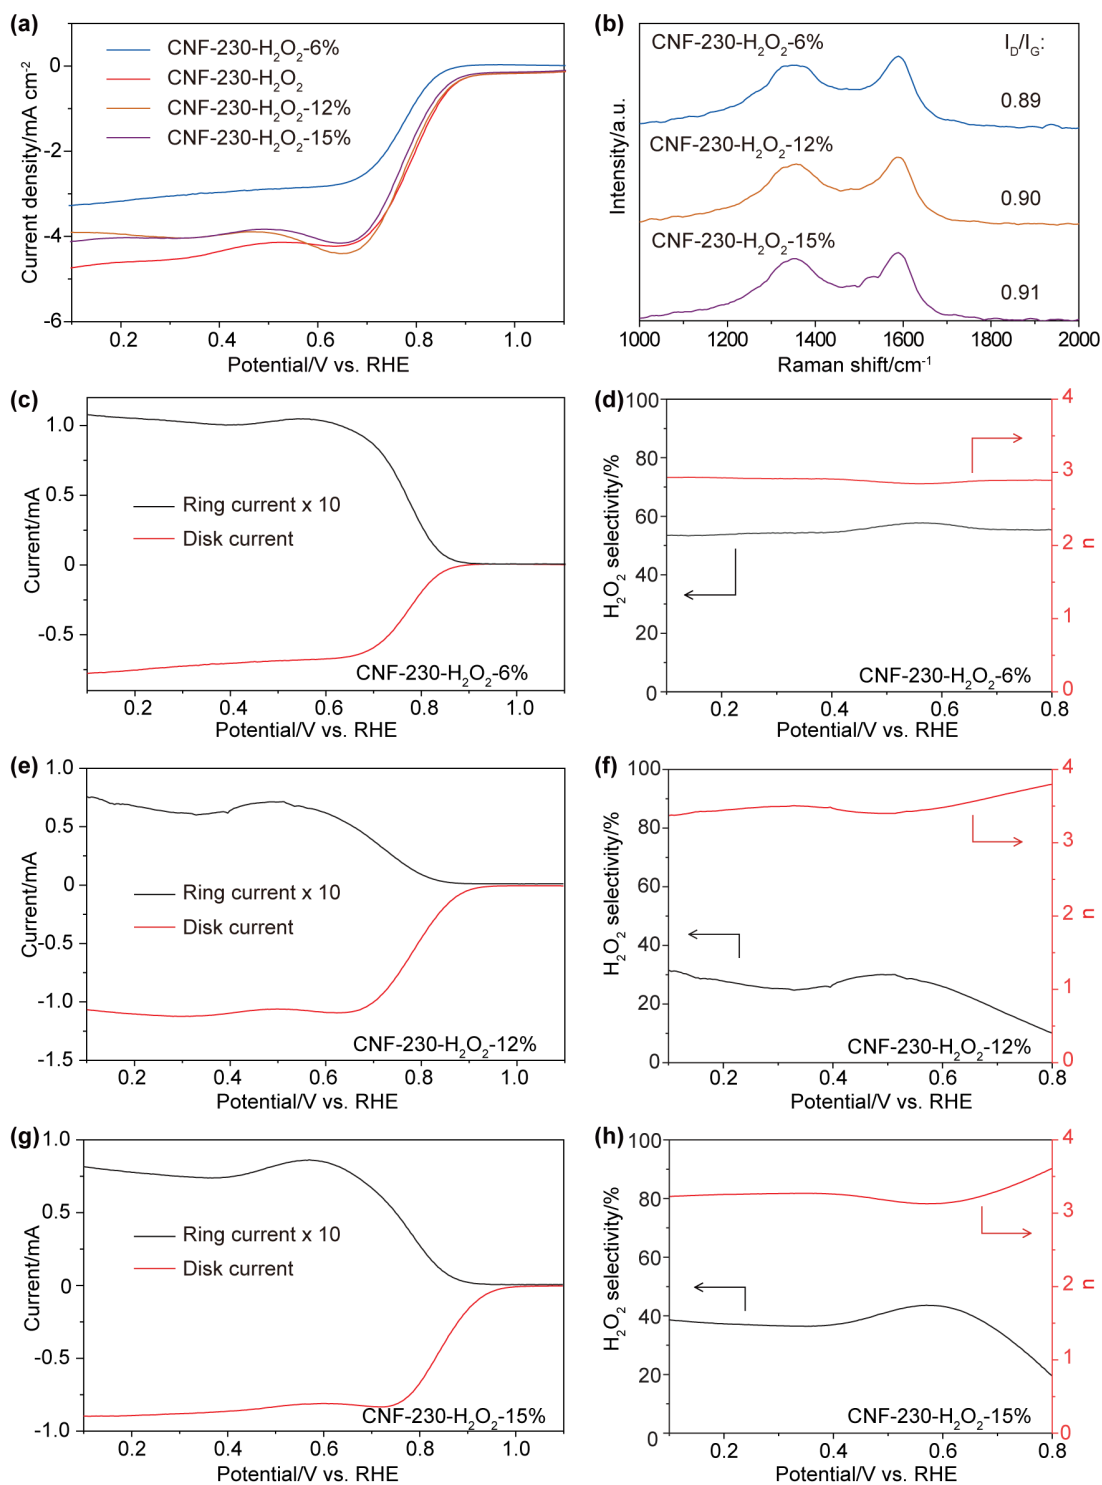

Figure S7. (a) Linear sweep voltammograms of CNF-based catalysts in the O<sub>2</sub>-saturated 0.1 M KOH. The catalysts were obtained after the treatment in H<sub>2</sub>O<sub>2</sub> aqueous solutions

with different H<sub>2</sub>O<sub>2</sub> concentrations (6, 8.6, 12, and 15%) in the oxidation step during the preparation. (b) Raman spectra of the CNF-230-H<sub>2</sub>O<sub>2</sub>-6%, CNF-230-H<sub>2</sub>O<sub>2</sub>-12%, and CNF-230-H<sub>2</sub>O<sub>2</sub>-15% catalysts. (c, e, g) Ring and disk currents on a rotating ring-disk electrode using (c) CNF-230-H<sub>2</sub>O<sub>2</sub>-6%, (e) CNF-230-H<sub>2</sub>O<sub>2</sub>-12%, and (g) CNF-230-H<sub>2</sub>O<sub>2</sub>-15% catalysts in the O<sub>2</sub>-saturated 0.1 M KOH at a rotating rate of 1600 rpm. (d, f, h) H<sub>2</sub>O<sub>2</sub> selectivity and electron transfer number based on ring and disk currents using (d) CNF-230-H<sub>2</sub>O<sub>2</sub>-6%, (f) CNF-230-H<sub>2</sub>O<sub>2</sub>-12% and (h) CNF-230-H<sub>2</sub>O<sub>2</sub>-15% catalysts. Note: the CNF-230-H<sub>2</sub>O<sub>2</sub> catalyst was treated in an 8.6% H<sub>2</sub>O<sub>2</sub> solution in the oxidation step during the preparation.

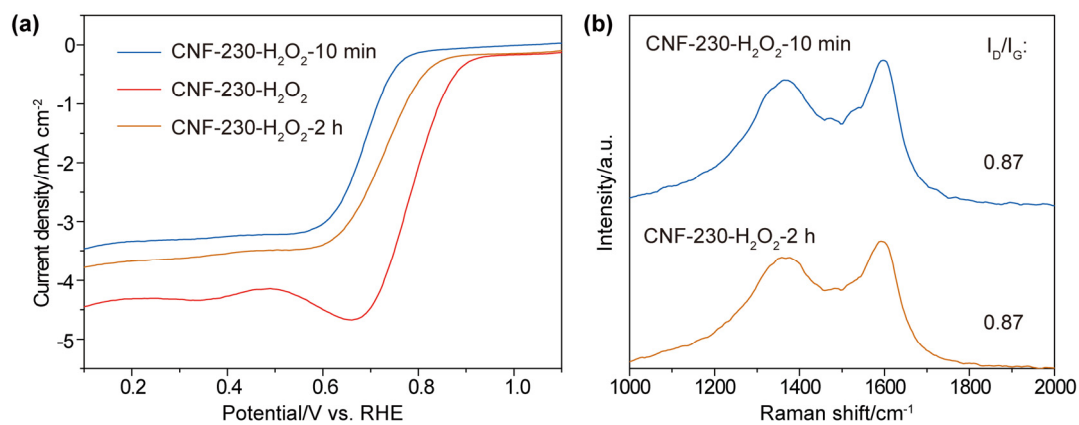

Figure S8. (a) Linear sweep voltammograms of CNF-based catalysts in the O<sub>2</sub>-saturated 0.1 M KOH. The catalysts were obtained after the treatment in the 8.6% H<sub>2</sub>O<sub>2</sub> aqueous solution for different durations (10 min, 1 h and 2 h) in the oxidation step during the preparation. (b) Raman spectra of the CNF-230-H<sub>2</sub>O<sub>2</sub>-10 min and CNF-230-H<sub>2</sub>O<sub>2</sub>-2 h catalysts. Note: the CNF-230-H<sub>2</sub>O<sub>2</sub> catalyst was obtained after treated in the H<sub>2</sub>O<sub>2</sub> solution for 1 h in the oxidation step during the preparation.

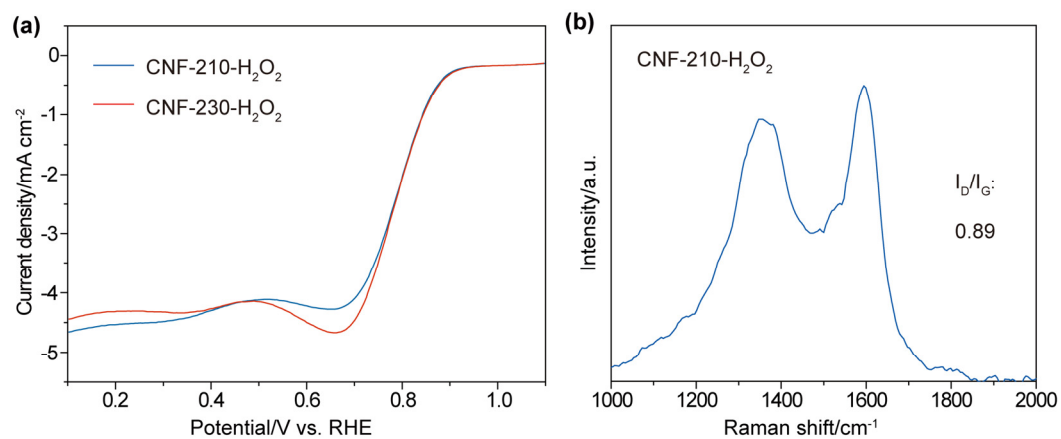

Figure S9. (a) Linear sweep voltammograms of CNF-based catalysts preoxidized at different temperatures (210 and 230 °C) in the O<sub>2</sub>-saturated 0.1 M KOH. (b) Raman spectrum of the CNF-210-H<sub>2</sub>O<sub>2</sub> catalyst.

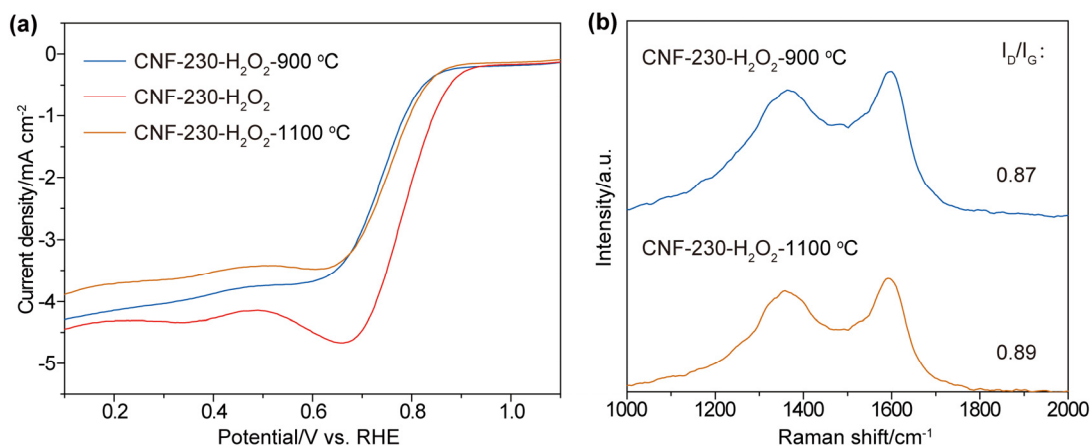

Figure S10. (a) Linear sweep voltammograms of CNF-based catalysts carbonized at different temperatures in the O<sub>2</sub>-saturated 0.1 M KOH. (b) Raman spectra of the CNF-230-H<sub>2</sub>O<sub>2</sub>-900 °C and CNF-230-H<sub>2</sub>O<sub>2</sub>-1000 °C catalysts. Note: the CNF-230-H<sub>2</sub>O<sub>2</sub> catalyst was carbonized at 1000 °C.



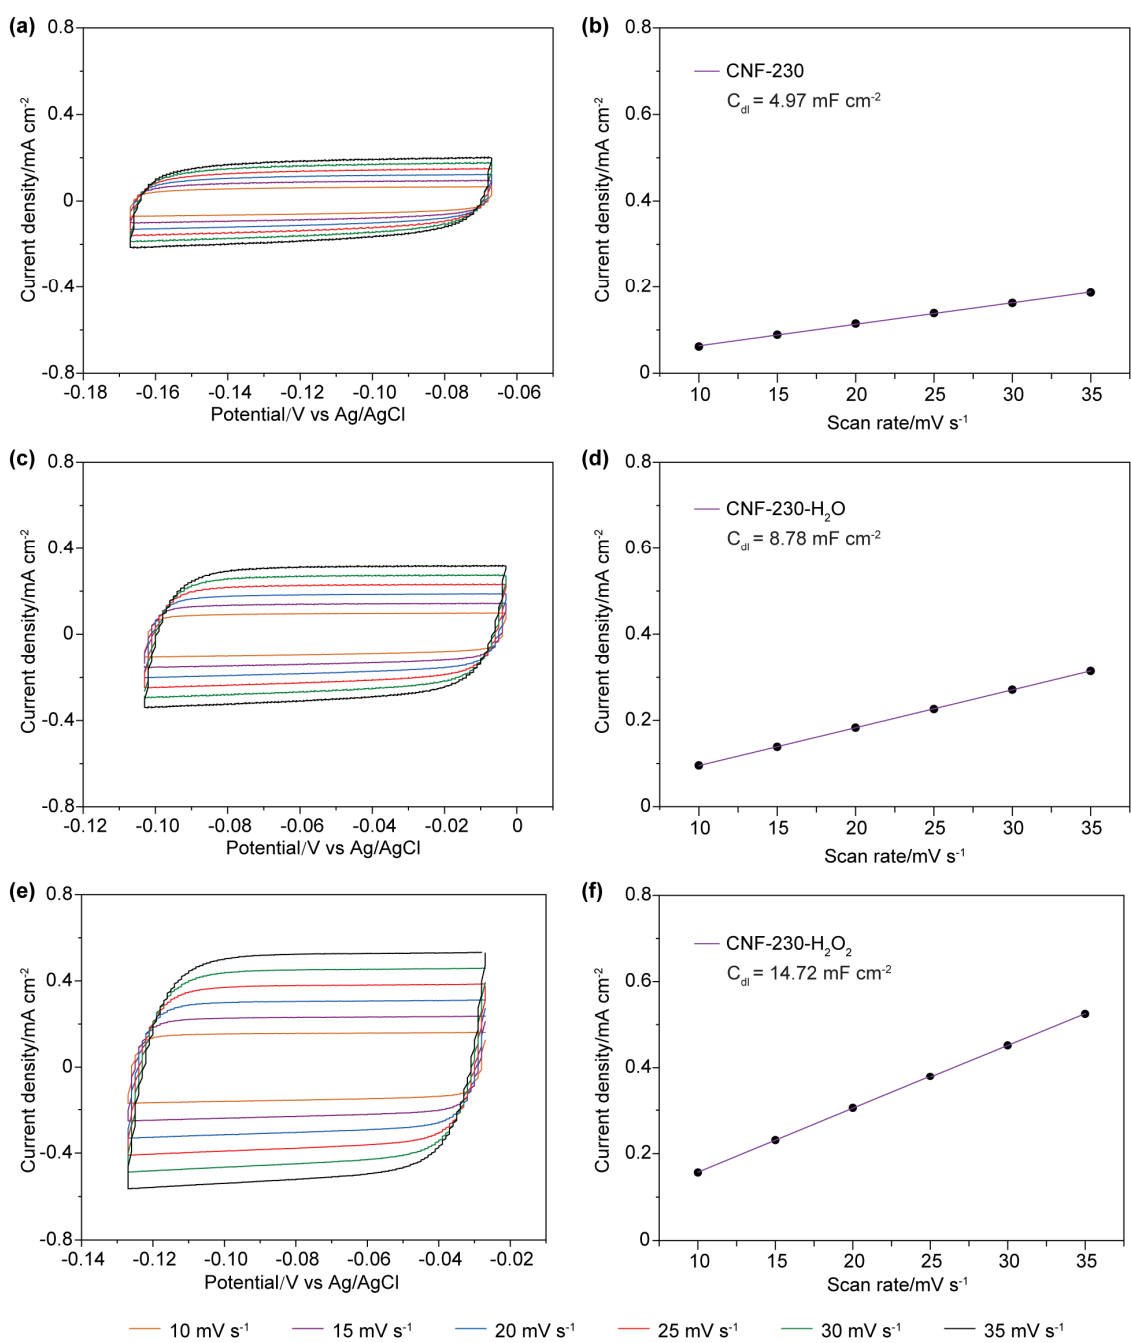

Figure S11. (a, c, e) CV curves in the non-Faradaic region of (a) CNF-230, (c) CNF-230-H<sub>2</sub>O, and (e) CNF-230-H<sub>2</sub>O<sub>2</sub> catalysts measured at different scan rates. (b, d, f) Corresponding current density-scan rate relationships of (b) CNF-230, (d) CNF-230-H<sub>2</sub>O, and (f) CNF-230-H<sub>2</sub>O<sub>2</sub> catalysts.

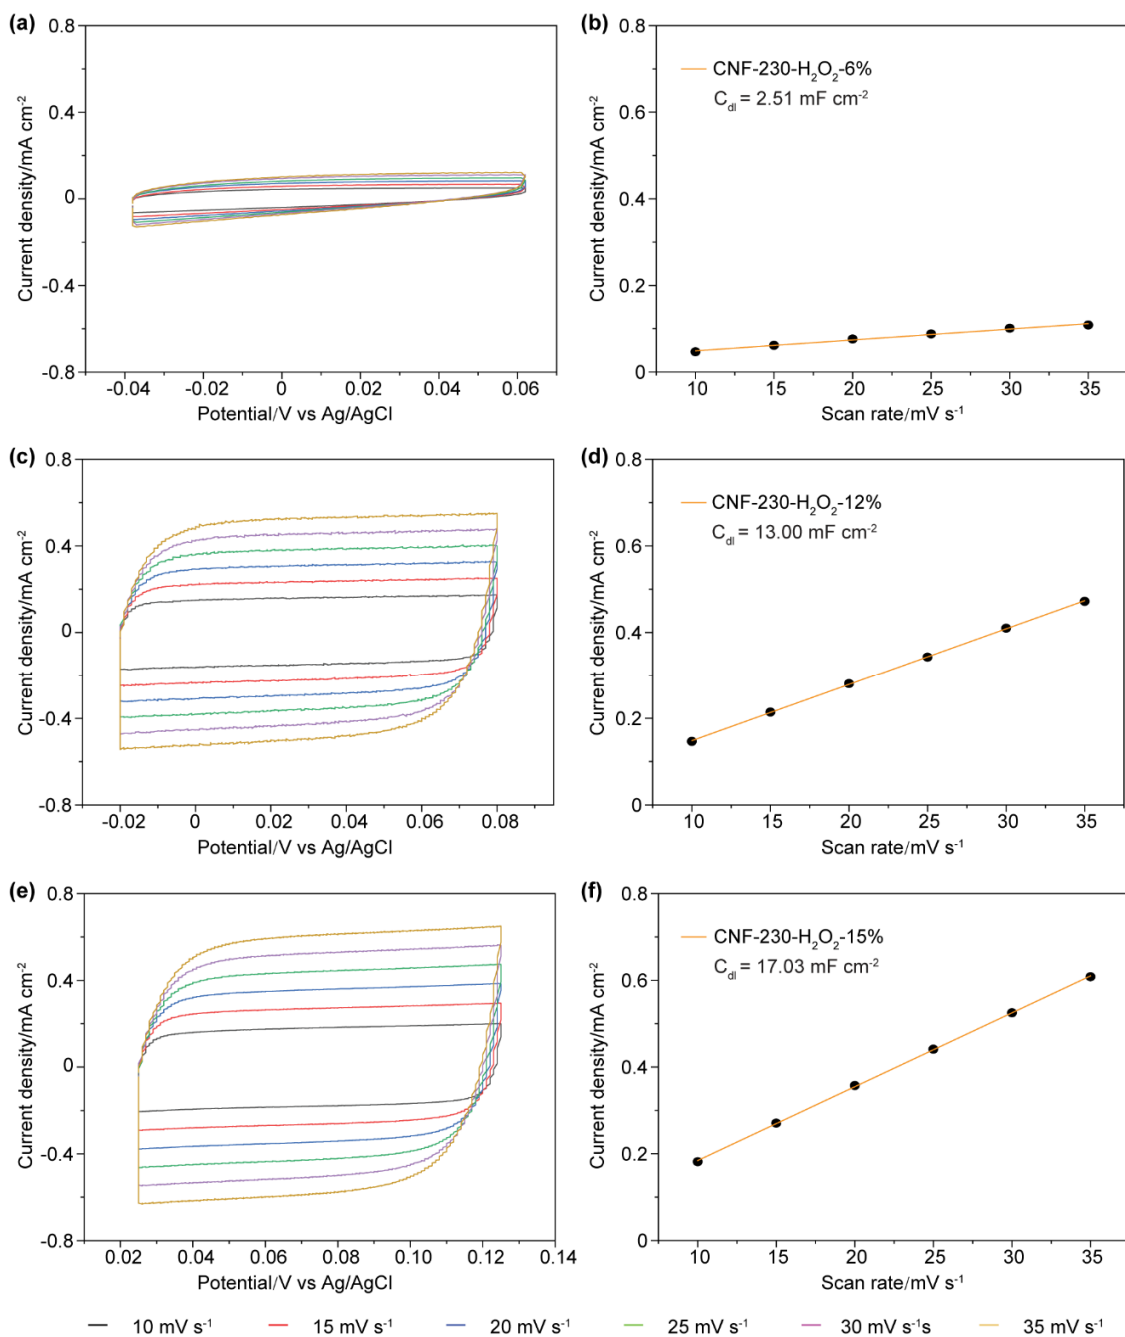

Figure S12. (a, c, e) CV curves in the non-Faradaic region of (a) CNF-230-H<sub>2</sub>O<sub>2</sub>-6%, (c) CNF-230-H<sub>2</sub>O<sub>2</sub>-12%, and (e) CNF-230-H<sub>2</sub>O<sub>2</sub>-15% catalysts measured at different scan rates. (b, d, f) Corresponding current density-scan rate relationships of (b) CNF-230-H<sub>2</sub>O<sub>2</sub>-6%, (d) CNF-230-H<sub>2</sub>O<sub>2</sub>-12%, and (f) CNF-230-H<sub>2</sub>O<sub>2</sub>-15% catalysts.

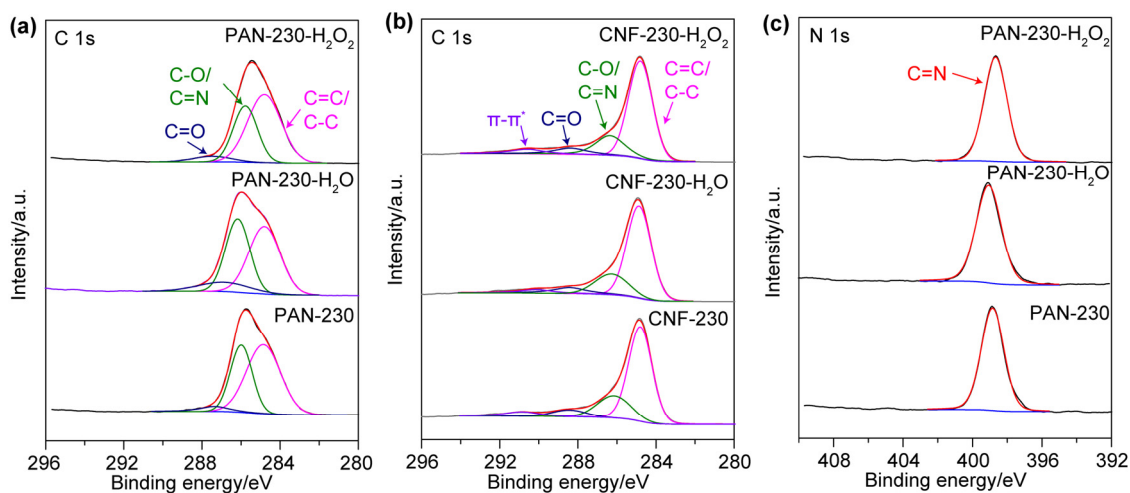

Figure S13. (a) High-resolution XPS spectra of the C 1s peak in PAN-based materials. (b) High-resolution XPS spectra of the C 1s peak in CNF-based catalysts. (c) High-resolution XPS spectra of the N 1s peak in PAN-based materials. Note: the peak heights in the figure were relative to the atomic ratios of C or N element in the corresponding material.

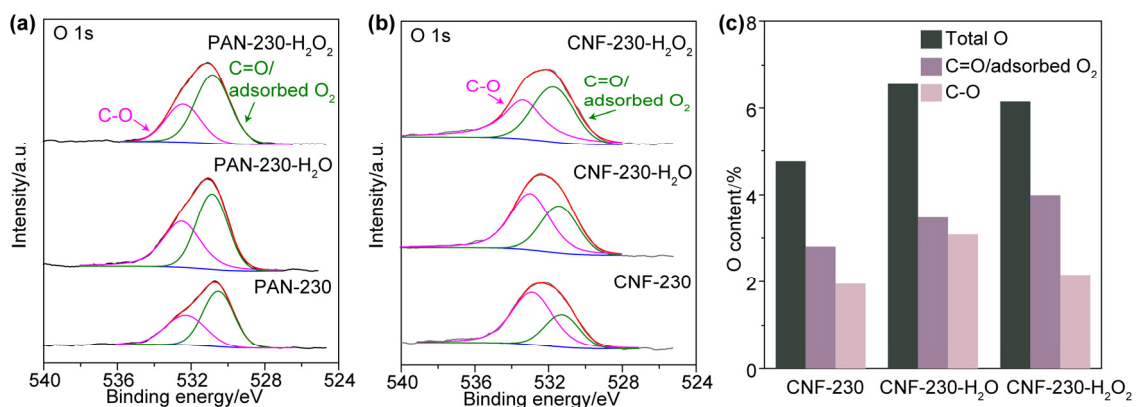

Figure S14. (a) High-resolution XPS spectra of the O 1s peak in PAN-based materials. (b) High-resolution XPS spectra of the O 1s peak in CNF-based catalysts. (c) O content in the PAN-based materials based on the deconvoluted O 1s spectra in (a). Note: the peak heights in the figure were relative to the atomic ratios of O in the corresponding material.

Table S1. The key experimental conditions used to convert PAN into PAN-based materials and CNF-based catalysts.

| Samples                                        | Temperature for peroxidation | Oxidation process at boiling temperature         | Temperature for carbonization |
|------------------------------------------------|------------------------------|--------------------------------------------------|-------------------------------|
| PAN-230                                        | 230 °C                       | -                                                | -                             |
| PAN-230-H <sub>2</sub> O <sub>2</sub>          | 230 °C                       | in 8.6% H <sub>2</sub> O <sub>2</sub> for 1 h    | -                             |
| PAN-230-H <sub>2</sub> O                       | 230 °C                       | in H <sub>2</sub> O for 1 h                      | -                             |
| CNF-230                                        | 230 °C                       | -                                                | 1000 °C                       |
| CNF-230-H <sub>2</sub> O <sub>2</sub>          | 230 °C                       | in 8.6% H <sub>2</sub> O <sub>2</sub> for 1 h    | 1000 °C                       |
| CNF-230-H <sub>2</sub> O                       | 230 °C                       | in H <sub>2</sub> O for 1 h                      | 1000 °C                       |
| CNF-230-H <sub>2</sub> O <sub>2</sub> -6%      | 230 °C                       | in 6% H <sub>2</sub> O <sub>2</sub> for 1 h      | 1000 °C                       |
| CNF-230-H <sub>2</sub> O <sub>2</sub> -12%     | 230 °C                       | in 12% H <sub>2</sub> O <sub>2</sub> for 1 h     | 1000 °C                       |
| CNF-230-H <sub>2</sub> O <sub>2</sub> -15%     | 230 °C                       | in 15% H <sub>2</sub> O <sub>2</sub> for 1 h     | 1000 °C                       |
| CNF-230-H <sub>2</sub> O <sub>2</sub> -10 min  | 230 °C                       | in 8.6% H <sub>2</sub> O <sub>2</sub> for 10 min | 1000 °C                       |
| CNF-230-H <sub>2</sub> O <sub>2</sub> -2 h     | 230 °C                       | in 8.6% H <sub>2</sub> O <sub>2</sub> for 2 h    | 1000 °C                       |
| CNF-210-H <sub>2</sub> O <sub>2</sub>          | 210 °C                       | in 8.6% H <sub>2</sub> O <sub>2</sub> for 1 h    | 1000 °C                       |
| CNF-230-H <sub>2</sub> O <sub>2</sub> -900 °C  | 230 °C                       | in 8.6% H <sub>2</sub> O <sub>2</sub> for 1 h    | 900 °C                        |
| CNF-230-H <sub>2</sub> O <sub>2</sub> -1100 °C | 230 °C                       | in 8.6% H <sub>2</sub> O <sub>2</sub> for 1 h    | 1100 °C                       |

Table S2. Electrochemical performance of catalysts for ORR in the O<sub>2</sub>-saturated 0.1 M KOH.

| Catalyst                                                         | $E_{onset}$ (V) | $E_{1/2}$ (V) | $j_{lim}$ (mA cm <sup>-2</sup> ) |
|------------------------------------------------------------------|-----------------|---------------|----------------------------------|
| CNF-230 (0.2 mg cm <sup>-2</sup> )                               | 0.727           | 0.696         | 2.95                             |
| CNF-230-H <sub>2</sub> O (0.2 mg cm <sup>-2</sup> )              | 0.782           | 0.735         | 3.46                             |
| CNF-230-H <sub>2</sub> O <sub>2</sub> (0.2 mg cm <sup>-2</sup> ) | 0.841           | 0.793         | 4.05                             |
| CNF-230-H <sub>2</sub> O <sub>2</sub> (1 mg cm <sup>-2</sup> )   | 0.919           | 0.805         | 4.96                             |
| Pt/C (0.2 mg cm <sup>-2</sup> )                                  | 0.898           | 0.839         | 5.25                             |

Table S3. Electrochemical performance of catalysts for ORR in the O<sub>2</sub>-saturated 50 mM PB.

| Catalyst                                                         | $E_{onset}$ (V) | $E_{1/2}$ (V) | $j_{lim}$ (mA cm <sup>-2</sup> ) |
|------------------------------------------------------------------|-----------------|---------------|----------------------------------|
| CNF-230-H <sub>2</sub> O <sub>2</sub> (0.2 mg cm <sup>-2</sup> ) | 0.650           | 0.484         | 4.45                             |
| CNF-230-H <sub>2</sub> O <sub>2</sub> (1 mg cm <sup>-2</sup> )   | 0.737           | 0.450         | 5.89                             |
| Pt/C (0.2 mg cm <sup>-2</sup> )                                  | 0.802           | 0.594         | 5.62                             |

Table S4. Comparison of ORR activity of the CNF-230-H<sub>2</sub>O<sub>2</sub> catalyst with other PAN-based ORR catalysts reported previously in the O<sub>2</sub>-saturated 0.1 M KOH ( $E_{onset}$  and  $E_{1/2}$ ) and in fuel cell applications ( $P_{max}$ ).

| Catalyst                              | Precursor with optional additives           | $E_{onset}$<br>/V vs. RHE                 | $E_{1/2}$<br>/V vs. RHE                   | $P_{max}$<br>/mW cm <sup>-2</sup>    | Ref.      |
|---------------------------------------|---------------------------------------------|-------------------------------------------|-------------------------------------------|--------------------------------------|-----------|
| PANRGO-700                            | PAN + graphene oxide                        | ~0.89<br><i>(~20 mV higher than Pt/C)</i> | 0.864<br><i>(~20 mV higher than Pt/C)</i> | 116<br><i>(10% lower than Pt/C)</i>  | [S7]      |
| Fe/IL-PAN-A1000                       | PAN + Fe(OAc) <sub>2</sub> + ionic liquid   | 0.95<br><i>(30 mV lower than Pt/C)</i>    | 0.74<br><i>(110 mV lower than Pt/C)</i>   | 289<br><i>(18% lower than Pt/C)</i>  | [S8]      |
| Co-PAN-A1000                          | PAN + Co(OAc) <sub>2</sub>                  | 0.91<br><i>(70 mV lower than Pt/C)</i>    | 0.74<br><i>(110 mV lower than Pt/C)</i>   | 267<br><i>(24% lower than Pt/C)</i>  | [S8]      |
| IL-Fe-PAN-900-0.75                    | PAN + ionic liquid                          | 1.00<br><i>(20 mV higher than Pt/C)</i>   | 0.85<br><i>(30 mV higher than Pt/C)</i>   | 61                                   | [S9]      |
| FeZ-CNS-900                           | PAN + ZnCl <sub>2</sub> + FeCl <sub>3</sub> | 0.963<br><i>(33 mV higher than Pt/C)</i>  | 0.881<br><i>(39 mV higher than Pt/C)</i>  | 168<br><i>(10% higher than Pt/C)</i> | [S10]     |
| PAC/ZnO-900                           | PAN + ZnO                                   | ~0.902<br><i>(22 mV higher than Pt/C)</i> | 0.852<br><i>(26 mV higher than Pt/C)</i>  | NA                                   | [S11]     |
| NCNFs                                 | PAN                                         | ~0.787<br><i>(45 mV lower than Pt/C)</i>  | ~0.737<br><i>(~70 mV lower than Pt/C)</i> | NA                                   | [S12]     |
| CNF-230-H <sub>2</sub> O <sub>2</sub> | PAN + H <sub>2</sub> O <sub>2</sub>         | 0.841<br><i>(57 mV lower than Pt/C)</i>   | 0.793<br><i>(46 mV lower than Pt/C)</i>   | 101<br><i>(24% higher than Pt/C)</i> | This work |



Table S5. Estimated cost of producing the CNF-230-H<sub>2</sub>O<sub>2</sub> catalyst in industry.

|              | Precursor | Preoxidation | Oxidation | Carbonization | Other processes | Total |
|--------------|-----------|--------------|-----------|---------------|-----------------|-------|
| Cost (\$/kg) | 7.5       | 2.4          | 3         | 3.6           | 1.5             | 18    |

Note: Typically, the cost of producing PAN-based carbon nanofibers in industry is ~\$15, which is comprised by the cost of precursor, preoxidation, carbonization, and other processes (such as sizing and winding).<sup>S13,S14</sup> In our method, we estimate that the additional oxidation process increases the total cost by ~20% according to the cost of preoxidation and carbonization.

## References

- [S1] S.S. Kocha, K. Shinozaki, J.W. Zack, D.J. Myers, N.N. Kariuki, T. Nowicki, V. Stamenkovic, Y. Kang, D. Li, D. Papageorgopoulos, Best practices and testing protocols for benchmarking orr activities of fuel cell electrocatalysts using rotating disk electrode, *Electrocatalysis*, 2017, 8, 366-374.
- [S2] J. Kibsgaard, T.F. Jaramillo, Molybdenum phosphosulfide: an active, acid-stable, earth-abundant catalyst for the hydrogen evolution reaction, *Angew. Chem., Int. Ed.*, 2014, 53, 14433-14437.
- [S3] H. Fei, J. Dong, M.J. Arellano-Jiménez, G. Ye, N. Dong Kim, E.L.G. Samuel, Z. Peng, Z. Zhu, F. Qin, J. Bao, M.J. Yacaman, P.M. Ajayan, D. Chen, J.M. Tour, Atomic cobalt on nitrogen-doped graphene for hydrogen generation, *Nat. Commun.*, 2015, 6, 8668.
- [S4] Y. Xu, H. Zhang, P. Zhang, M. Lu, X. Xie, L. Huang, In situ exsolved Co components on wood ear-derived porous carbon for catalyzing oxygen reduction over a wide pH range, *J. Mater. Chem. A*, 2021, 9, 10695-10703.
- [S5] I. Karacan, G. Erdogan, The influence of thermal stabilization stage on the molecular structure of polyacrylonitrile fibers prior to the carbonization stage, *Fiber Polym.*, 2012, 13, 295-302.
- [S6] S. Lee, J. Kim, B.-C. Ku, J. Kim, H.-I. Joh, Structural evolution of polyacrylonitrile fibers in stabilization and carbonization. *Adv. Chem. Eng. Sci.*, 2012, 2, 275-282.
- [S7] H. Begum, M.S. Ahmed, S. Jung, Template-free synthesis of polyacrylonitrile-derived porous carbon nanoballs on graphene for efficient oxygen reduction in zinc–air batteries, *J. Mater. Chem. A*, 2021, 9, 9644-9654.
- [S8] G. Massaglia, A. Sacco, M. Castellino, A. Chiodoni, F. Frascella, S. Bianco, C.F. Pirri, M. Quaglio, N-doping modification by plasma treatment in polyacrylonitrile derived carbon-based nanofibers for oxygen reduction reaction, *Int. J. Hydrogen Energy*, 2021, 46, 13845-13854.

- [S9] C. Wang, Q. Li, J. Guo, Y. Ren, J. Zhang, F. Yan, Metal-containing ionic liquid/polyacrylonitrile-derived carbon nanofibers for oxygen reduction reaction and flexible Zn–air battery, *Chem.-Asian J.*, 2019, 14, 2008-2017.
- [S10] G. Li, L. Pei, Y. Wu, B. Zhu, Q. Hu, H. Yang, Q. Zhang, J. Liu, C. He, Facile synthesis of polyacrylonitrile-based N/S-codoped porous carbon as an efficient oxygen reduction electrocatalyst for zinc–air batteries, *J. Mater. Chem. A*, 2019, 7, 11223-11233.
- [S11] C. You, R. Zheng, T. Shu, L. Liu, S. Liao, High porosity and surface area self-doped carbon derived from polyacrylonitrile as efficient electrocatalyst towards oxygen reduction, *J. Power Sources*, 2016, 324, 134-141.
- [S12] D. Liu, X. Zhang, Z. Sun, T. You, Free-standing nitrogen-doped carbon nanofiber films as highly efficient electrocatalysts for oxygen reduction, *Nanoscale*, 2013, 5, 9528-9531.
- [S13] A.S. Gill, D. Visotsky, L. Mears, J. D. Summers, Cost estimation model for polyacrylonitrile-based carbon fiber manufacturing process, *J. Manuf. Sci. Eng.*, 2017, 139, 041011.
- [S14] S. Nunna, P. Blanchard, D. Buckmaster, S. Davis, M. Naebe, Development of a cost model for the production of carbon fibres, *Heliyon*, 2019, 5, e02698.
